# Supplementary material for: Beyond a heuristic analysis: integration of process and working-fluid design for organic Rankine cycles
Source: Royal Society of Chemistry journal article supplement (doi:10.1039/c9me00089e), 2019-12-09
Supplement: c9me00089e2.xlsx [file c9me00089e2.xlsx]

## Sheet: Brute force
	brute test summary - 3175 molecules, max 12 groups
		CS1	CS2	CS3
	test error	4	4	4
	test passed	48	263	26
	test failed	2605	2908	2112
	t_melt failed	518	0	1033
		3175	3175	3175
			2 groups	3 groups	4 groups	5 groups	6 groups	7 groups	8 groups	9 groups	10 groups	11 groups	12 groups	total
	CS1	test error	0	0	0	0	0	0	0	0	0	0	0	0
		test passed	3	4	6	10	12	16	0	0	0	0	0	51
		test failed	4	10	26	47	85	138	230	327	437	575	727	2606
		t_melt failed	0	1	2	7	12	20	31	49	83	125	188	518
	CS2	test error	0	0	0	0	0	0	0	0	0	0	0	0
		test passed	3	8	16	24	29	39	46	40	37	25	0	267
		test failed	4	7	18	40	80	135	215	336	483	675	915	2908
		t_melt failed	0	0	0	0	0	0	0	0	0	0	0	0
	CS3	test error	0	0	0	0	0	0	0	0	0	0	0	0
		test passed	1	3	6	9	10	0	0	0	0	0	0	29
		test failed	5	10	22	44	79	133	196	267	354	450	553	2113
		t_melt failed	1	2	6	11	20	41	65	109	166	250	362	1033

## Sheet: cs1_mol_list
Rank	Molecule	Power (MW)	m_flow (kg/s)	Superheat (K)	P inlet (Pa)	P outlet (Pa)
1	2-1-0-0-0-0-0-0-0	1.66212	43.318	0	813257	2528130
2	1-0-0-0-0-1-0-0-1	1.66083	43.1991	5.16126	991049	3092120
3	2-2-0-0-0-0-0-0-0	1.56679	37.5982	0	210099	752542
4	1-1-0-0-0-1-0-0-1	1.56003	37.8474	0	255568	890228
5	2-1-1-0-0-0-0-0-0	1.53826	36.2199	0	174840	656075
6	2-0-0-0-0-2-0-0-0	1.5373	34.948	0	187470	691870
7	0-0-0-0-0-2-0-0-2	1.5361	35.968	0	250290	880990
8	0-1-0-0-0-2-0-0-2	1.20063	32.2856	0	100000	347935
9	1-2-0-0-0-1-0-0-1	1.19122	33.0796	0	100000	343746
10	2-2-0-1-0-0-0-0-0	1.16351	33.8501	0	100000	345096
11	2-3-0-0-0-0-0-0-0	1.0222	30.9704	0	100000	314080
12	2-1-0-0-0-2-0-0-0	0.962921	28.9712	0	100000	306975
13	1-1-1-0-0-1-0-0-1	0.928833	28.6975	0	100000	305371
14	2-2-1-0-0-0-0-0-0	0.844231	27.8579	0	100000	289322
15	2-1-2-0-0-0-0-0-0	0.69502	25.0115	0	100000	267890
16	2-0-0-0-0-0-0-0-0	0.676482	55.2332	73.6341	3573710	4429580
17	2-0-0-0-1-0-0-0-0	0.57205	20.9733	0	100000	254902
18	1-2-0-1-0-1-0-0-1	0.418214	21.5352	0	100000	213167
19	0-2-0-0-0-2-0-0-2	0.39456	20.1919	0	100000	206748
20	1-3-0-0-0-1-0-0-1	0.373446	20.0872	0	100000	202396
21	2-3-0-1-0-0-0-0-0	0.353204	20.0592	0	100000	200537
22	1-0-0-0-0-3-0-0-1	0.3173	14.721	0	100000	192950
23	2-4-0-0-0-0-0-0-0	0.292785	17.9607	0	100000	186948
24	2-2-0-0-0-2-0-0-0	0.282182	17.1265	0	100000	185418
25	2-2-1-1-0-0-0-0-0	0.267549	17.2406	0	100000	185494
26	1-2-1-0-0-1-0-0-1	0.255428	16.3225	0	100000	181420
27	2-3-1-0-0-0-0-0-0	0.211837	15.0908	0	100000	172054
28	2-1-0-0-1-0-0-0-0	0.175554	12.9632	0	100000	168150
29	1-0-0-0-0-0-0-1-0	0.154805	5.20319	15.95	100000	178092
30	2-2-2-0-0-0-0-0-0	0.145868	12.3588	0	100000	158319
31	2-1-1-0-0-2-0-0-0	0.125256	11.029	0	100000	152479
32	0-2-0-1-0-2-0-0-2	0.0611066	8.62643	0	100000	134369
33	2-3-0-2-0-0-0-0-0	0.0594228	8.91215	0	100000	134235
34	1-3-0-1-0-1-0-0-1	0.0590847	8.6731	0	100000	133620
35	1-1-0-0-0-3-0-0-1	0.0570509	7.04657	0	100000	132576
36	0-3-0-0-0-2-0-0-2	0.0546881	8.11856	0	100000	131710
37	1-4-0-0-0-1-0-0-1	0.0451303	7.50863	0	100000	128420
38	2-4-0-1-0-0-0-0-0	0.0381151	7.04708	0	100000	126253
39	2-5-0-0-0-0-0-0-0	0.0230782	5.4159	0	100000	119649
40	2-3-0-0-0-2-0-0-0	0.0229035	5.26941	0	100000	119627
41	1-2-1-1-0-1-0-0-1	0.0228893	5.3003	0	100000	120208
42	1-1-0-0-0-0-0-1-0	0.0188131	2.2622	5.63048	100000	122736
43	2-2-0-1-0-2-0-0-0	0.0173854	4.58317	0	100000	117184
44	1-0-0-0-0-0-1-0-0	0.0157789	3.90577	0	100000	117873
45	2-3-1-1-0-0-0-0-0	0.0155612	4.4429	0	100000	116382
46	1-3-1-0-0-1-0-0-1	0.0148907	4.2415	0	100000	115773
47	2-2-0-0-1-0-0-0-0	0.0106413	3.49181	0	100000	113769
48	2-4-1-0-0-0-0-0-0	0.00638671	2.81344	0	100000	110082
49	2-2-2-1-0-0-0-0-0	0.00315107	1.97152	0	100000	107203
50	2-3-2-0-0-0-0-0-0	6.86149e-05	0.287591	0	100000	101019
51	2-2-1-0-0-2-0-0-0	5.58394e-05	0.253466	0	100000	100907

## Sheet: cs2_mol_list
Rank	Molecule	Power (MW)	m_flow (kg/s)	Superheat (K)	P inlet (Pa)	P outlet (Pa)
1	2-2-0-0-0-0-0-0-0	8.34718	92.5452	3.82656	210099	3430050
2	1-1-0-0-0-1-0-0-1	8.18459	97.8749	5.74671	255568	3418570
3	0-0-0-0-0-2-0-0-2	7.52958	97.9018	0	250287	2837040
4	2-1-1-0-0-0-0-0-0	7.44963	78.9169	0	174840	3801910
5	2-0-0-0-0-2-0-0-0	6.49576	74.8173	0	187473	4402930
6	2-1-0-0-0-0-0-0-0	6.2878	85.8181	59.4078	813257	3886540
7	1-2-0-0-0-1-0-0-1	5.82809	76.311	0	100000	1201930
8	1-0-0-0-0-1-0-0-1	5.77865	89.734	67.8977	991049	3681080
9	0-1-0-0-0-2-0-0-2	5.77102	74.2349	0	100000	1210160
10	2-2-0-1-0-0-0-0-0	5.75224	78.7325	0	100000	1214680
11	2-3-0-0-0-0-0-0-0	5.3908	74.186	0	100000	1079060
12	2-1-0-0-0-2-0-0-0	5.13969	70.2193	0	100000	1046170
13	1-1-1-0-0-1-0-0-1	4.95883	70.1697	0	100000	1018290
14	2-2-1-0-0-0-0-0-0	4.773	69.8454	0	100000	965867
15	2-1-2-0-0-0-0-0-0	4.25148	65.8037	0	100000	881896
16	2-0-0-0-1-0-0-0-0	3.85051	58.7443	0	100000	868460
17	1-2-0-1-0-1-0-0-1	3.46156	65.695	0	100000	694254
18	0-2-0-0-0-2-0-0-2	3.37289	62.4764	0	100000	665123
19	1-3-0-0-0-1-0-0-1	3.32417	63.2985	0	100000	651507
20	2-3-0-1-0-0-0-0-0	3.25366	64.4628	0	100000	652741
21	2-4-0-0-0-0-0-0-0	3.04019	61.111	0	100000	600200
22	1-0-0-0-0-3-0-0-1	3.00423	48.2705	0	100000	606891
23	2-2-0-0-0-2-0-0-0	2.97326	58.8245	0	100000	595236
24	2-2-1-1-0-0-0-0-0	2.89519	60.3551	0	100000	605234
25	1-2-1-0-0-1-0-0-1	2.84444	57.8719	0	100000	583588
26	2-3-1-0-0-0-0-0-0	2.68478	56.9991	0	100000	553974
27	2-1-0-0-1-0-0-0-0	2.49861	52.5143	0	100000	565822
28	2-2-2-0-0-0-0-0-0	2.36635	53.0455	0	100000	513673
29	1-0-0-0-0-0-0-1-0	2.30582	19.9118	61.5554	100000	703550
30	2-1-1-0-0-2-0-0-0	2.26295	49.9214	0	100000	489666
31	2-3-0-2-0-0-0-0-0	1.9232	54.02	0	100000	437618
32	0-2-0-1-0-2-0-0-2	1.92202	51.532	0	100000	432423
33	1-3-0-1-0-1-0-0-1	1.91912	52.5745	0	100000	429955
34	0-3-0-0-0-2-0-0-2	1.88635	50.6067	0	100000	418701
35	1-1-0-0-0-3-0-0-1	1.87156	42.9414	0	100000	418473
36	1-4-0-0-0-1-0-0-1	1.82647	50.6595	0	100000	408385
37	2-4-0-1-0-0-0-0-0	1.77389	51.104	0	100000	406588
38	2-5-0-0-0-0-0-0-0	1.64469	48.487	0	100000	380821
39	2-3-0-0-0-2-0-0-0	1.63453	47.2535	0	100000	381183
40	1-2-1-1-0-1-0-0-1	1.62057	47.6109	0	100000	391499
41	2-2-0-1-0-2-0-0-0	1.56995	46.3752	0	100000	378004
42	2-3-1-1-0-0-0-0-0	1.55037	47.2829	0	100000	379409
43	1-1-0-0-0-0-0-1-0	1.54421	23.0223	0	100000	513462
44	1-3-1-0-0-1-0-0-1	1.5411	45.9244	0	100000	372311
45	2-2-0-0-1-0-0-0-0	1.485	44.211	0	100000	382308
46	2-4-1-0-0-0-0-0-0	1.42727	44.7335	0	100000	354508
47	1-0-0-0-0-0-1-0-0	1.41648	37.615	0	100000	410853
48	2-0-0-0-0-0-0-0-0	1.36564	108.052	79.3723	3573710	4429580
49	2-2-2-1-0-0-0-0-0	1.34937	43.6232	0	100000	354786
50	2-3-2-0-0-0-0-0-0	1.22843	41.0504	0	100000	330091
51	2-2-1-0-0-2-0-0-0	1.22527	39.8979	0	100000	326061
52	1-0-0-0-1-1-0-0-1	1.17525	31.9248	0	100000	338353
53	2-1-1-0-1-0-0-0-0	1.10613	37.1786	0	100000	325887
54	0-0-0-0-0-1-0-1-1	1.07594	17.8458	0	100000	394539
55	1-2-0-0-0-3-0-0-1	1.0527	35.5163	0	100000	295988
56	1-3-0-2-0-1-0-0-1	1.04042	41.6618	0	100000	300745
57	0-3-0-1-0-2-0-0-2	0.997284	39.7244	0	100000	291028
58	1-4-0-1-0-1-0-0-1	0.977838	40.0212	0	100000	287564
59	2-4-0-2-0-0-0-0-0	0.970706	40.7389	0	100000	289660
60	0-4-0-0-0-2-0-0-2	0.966892	38.8424	0	100000	283004
61	1-2-0-0-0-0-0-1-0	0.961866	21.3073	0	100000	359445
62	1-5-0-0-0-1-0-0-1	0.918947	38.4202	0	100000	275674
63	0-0-0-0-0-4-0-0-2	0.918351	27.2955	0	100000	276518
64	2-5-0-1-0-0-0-0-0	0.883878	38.4219	0	100000	273309
65	2-0-0-0-0-4-0-0-0	0.859263	26.7275	0	100000	269360
66	2-3-1-2-0-0-0-0-0	0.829567	37.2221	0	100000	271677
67	2-4-0-0-0-2-0-0-0	0.8134	35.7338	0	100000	260690
68	2-6-0-0-0-0-0-0-0	0.807335	36.2909	0	100000	259222
69	1-3-1-1-0-1-0-0-1	0.79883	35.6519	0	100000	264017
70	2-3-0-0-1-0-0-0-0	0.791111	34.797	0	100000	268266
71	2-3-0-1-0-2-0-0-0	0.788012	35.2172	0	100000	259755
72	1-1-1-0-0-0-0-1-0	0.778689	19.1212	0	100000	321143
73	2-2-0-1-1-0-0-0-0	0.774786	34.4773	0	100000	268855
74	1-4-1-0-0-1-0-0-1	0.74954	34.2477	0	100000	253541
75	2-4-1-1-0-0-0-0-0	0.746558	34.9224	0	100000	255614
76	1-1-0-0-1-1-0-0-1	0.745791	28.5989	0	100000	263870
77	0-1-0-0-0-1-0-1-1	0.707089	17.3108	0	100000	301250
78	2-5-1-0-0-0-0-0-0	0.676276	32.8758	0	100000	242247
79	1-1-1-0-0-3-0-0-1	0.67345	27.4826	0	100000	242998
80	2-3-2-1-0-0-0-0-0	0.622492	31.5035	0	100000	238993
81	2-3-1-0-0-2-0-0-0	0.580648	29.5259	0	100000	228076
82	2-2-1-0-1-0-0-0-0	0.569113	28.857	0	100000	234561
83	2-4-2-0-0-0-0-0-0	0.556632	29.4904	0	100000	225988
84	1-2-0-1-0-0-0-1-0	0.556545	18.8314	0	100000	265741
85	1-1-0-0-0-0-1-0-0	0.548164	21.1804	0	100000	259524
86	2-2-1-1-0-2-0-0-0	0.547849	28.642	0	100000	225165
87	1-3-0-0-0-0-0-1-0	0.531386	18.1794	0	100000	256881
88	0-1-0-0-0-4-0-0-2	0.523148	23.217	0	100000	216866
89	1-3-0-0-0-3-0-0-1	0.511481	26.8824	0	100000	215178
90	2-4-0-3-0-0-0-0-0	0.471146	30.2615	0	100000	213543
91	2-1-0-0-0-4-0-0-0	0.46868	22.1818	0	100000	209055
92	0-3-0-2-0-2-0-0-2	0.460215	28.8081	0	100000	210398
93	1-4-0-2-0-1-0-0-1	0.459775	29.2984	0	100000	210077
94	1-2-0-1-0-3-0-0-1	0.448839	25.0494	0	100000	207158
95	0-4-0-1-0-2-0-0-2	0.441366	28.077	0	100000	205626
96	1-5-0-1-0-1-0-0-1	0.423265	27.9013	0	100000	202522
97	0-5-0-0-0-2-0-0-2	0.420531	27.2451	0	100000	200755
98	2-5-0-2-0-0-0-0-0	0.41559	28.1675	0	100000	202573
99	1-2-1-0-0-0-0-1-0	0.413034	15.9411	0	100000	232260
100	0-2-0-0-0-1-0-1-1	0.398158	15.0818	0	100000	227171
101	1-2-0-0-1-1-0-0-1	0.394163	22.8644	0	100000	203064
102	1-6-0-0-0-1-0-0-1	0.388827	26.5257	0	100000	195535
103	2-2-2-0-0-2-0-0-0	0.379664	23.2876	0	100000	197370
104	2-6-0-1-0-0-0-0-0	0.368039	26.2453	0	100000	193301
105	2-0-0-0-1-2-0-0-0	0.354186	18.6693	0	100000	197188
106	1-3-1-2-0-1-0-0-1	0.353066	25.2905	0	100000	193709
107	2-4-0-0-1-0-0-0-0	0.352525	24.8086	0	100000	194552
108	2-3-0-1-1-0-0-0-0	0.350581	24.7796	0	100000	195609
109	2-5-0-0-0-2-0-0-0	0.333912	24.3478	0	100000	186569
110	2-4-1-2-0-0-0-0-0	0.333207	24.9123	0	100000	190032
111	2-7-0-0-0-0-0-0-0	0.32592	24.4555	0	100000	185045
112	2-4-0-1-0-2-0-0-0	0.325383	24.068	0	100000	186300
113	1-4-1-1-0-1-0-0-1	0.322465	24.0195	0	100000	186911
114	2-3-0-2-0-2-0-0-0	0.311969	23.5601	0	100000	185203
115	1-2-1-0-0-3-0-0-1	0.300779	20.0423	0	100000	182154
116	1-5-1-0-0-1-0-0-1	0.294821	22.8132	0	100000	180826
117	2-5-1-1-0-0-0-0-0	0.290089	23.0428	0	100000	181055
118	2-3-2-2-0-0-0-0-0	0.260728	21.7685	0	100000	178026
119	1-3-0-1-0-0-0-1-0	0.259655	14.449	0	100000	193999
120	2-6-1-0-0-0-0-0-0	0.253339	21.3437	0	100000	173333
121	1-4-0-0-0-0-0-1-0	0.241849	13.8261	0	100000	188191
122	0-2-0-0-0-4-0-0-2	0.235652	17.1769	0	100000	169069
123	2-3-1-0-1-0-0-0-0	0.231278	19.7037	0	100000	172983
124	2-2-1-1-1-0-0-0-0	0.222734	19.3054	0	100000	172416
125	2-4-2-1-0-0-0-0-0	0.221359	19.887	0	100000	169294
126	2-4-1-0-0-2-0-0-0	0.211832	19.0099	0	100000	165716
127	1-1-1-0-1-1-0-0-1	0.211176	16.2524	0	100000	169732
128	0-0-0-0-1-2-0-0-2	0.206911	13.6023	0	100000	168591
129	2-3-1-1-0-2-0-0-0	0.199461	18.4324	0	100000	164194
130	2-2-0-0-0-4-0-0-0	0.197672	15.8494	0	100000	162225
131	1-4-0-0-0-3-0-0-1	0.189365	17.559	0	100000	160449
132	2-5-2-0-0-0-0-0-0	0.189118	18.233	0	100000	161958
133	1-2-1-1-0-0-0-1-0	0.184896	12.0756	0	100000	176381
134	1-2-0-0-0-0-1-0-0	0.179902	11.7604	0	100000	176941
135	0-3-0-0-0-1-0-1-1	0.177649	11.4435	0	100000	172316
136	0-2-0-1-0-1-0-1-1	0.174587	11.4008	0	100000	172637
137	2-1-0-0-1-2-0-0-0	0.172238	14.483	0	100000	160665
138	1-3-1-0-0-0-0-1-0	0.172054	11.5816	0	100000	171605
139	1-0-0-0-0-2-0-1-0	0.166557	7.79329	0	100000	170896
140	1-4-0-3-0-1-0-0-1	0.165757	18.6296	0	100000	157790
141	1-3-0-1-0-3-0-0-1	0.163453	16.2557	0	100000	156012
142	1-3-0-0-1-1-0-0-1	0.156431	15.5989	0	100000	156733
143	0-4-0-2-0-2-0-0-2	0.149517	17.3344	0	100000	153666
144	2-5-0-3-0-0-0-0-0	0.14861	17.8425	0	100000	154029
145	1-5-0-2-0-1-0-0-1	0.145598	17.3605	0	100000	152754
146	0-5-0-1-0-2-0-0-2	0.138789	16.6303	0	100000	150703
147	1-2-0-1-1-1-0-0-1	0.132647	14.3021	0	100000	152055
148	2-2-2-0-1-0-0-0-0	0.130369	14.4547	0	100000	152074
149	1-6-0-1-0-1-0-0-1	0.127546	16.1448	0	100000	148186
150	0-6-0-0-0-2-0-0-2	0.127388	15.8494	0	100000	147641
151	2-6-0-2-0-0-0-0-0	0.122702	16.0888	0	100000	147603
152	2-3-2-0-0-2-0-0-0	0.113744	13.6259	0	100000	145755
153	0-0-0-0-0-1-1-0-1	0.113465	6.84671	15.3024	100000	156485
154	1-7-0-0-0-1-0-0-1	0.110784	14.9407	0	100000	143872
155	2-4-0-1-1-0-0-0-0	0.109622	14.6948	0	100000	146061
156	2-3-0-2-1-0-0-0-0	0.108945	14.6498	0	100000	146482
157	2-5-0-0-1-0-0-0-0	0.107837	14.5467	0	100000	145096
158	2-4-1-3-0-0-0-0-0	0.105524	14.8596	0	100000	144655
159	1-1-1-0-0-0-1-0-0	0.101762	7.79623	14.4091	100000	154806
160	0-1-0-0-1-2-0-0-2	0.101361	10.6976	0	100000	144149
161	2-7-0-1-0-0-0-0-0	0.100877	14.4698	0	100000	141968
162	1-4-1-2-0-1-0-0-1	0.0942386	13.77	0	100000	141337
163	1-3-0-2-0-0-0-1-0	0.093455	9.65156	0	100000	149186
164	1-3-1-0-0-3-0-0-1	0.0877112	11.6635	0	100000	138773
165	2-6-0-0-0-2-0-0-0	0.0870376	13.1363	0	100000	138180
166	2-5-0-1-0-2-0-0-0	0.085174	13.0153	0	100000	138115
167	1-1-0-0-0-2-0-1-0	0.0844721	6.57179	0	100000	146022
168	2-5-1-2-0-0-0-0-0	0.0833467	13.1062	0	100000	138463
169	1-4-0-1-0-0-0-1-0	0.0828618	9.04679	0	100000	145066
170	2-8-0-0-0-0-0-0-0	0.0820127	12.9371	0	100000	136857
171	2-4-0-2-0-2-0-0-0	0.0813096	12.7177	0	100000	137538
172	1-5-1-1-0-1-0-0-1	0.080551	12.6669	0	100000	137290
173	2-0-0-0-2-0-0-0-0	0.0746503	9.01921	0	100000	139537
174	1-5-0-0-0-0-0-1-0	0.0729255	8.43206	0	100000	141246
175	1-0-0-0-1-0-0-1-0	0.070635	5.87143	0	100000	144544
176	1-6-1-0-0-1-0-0-1	0.0684076	11.6033	0	100000	133598
177	1-2-1-0-1-1-0-0-1	0.0658717	9.87489	0	100000	134562
178	1-2-1-1-0-3-0-0-1	0.0658224	10.0412	0	100000	133341
179	0-3-0-0-0-4-0-0-2	0.0657756	9.84947	0	100000	132414
180	2-6-1-1-0-0-0-0-0	0.0655242	11.5373	0	100000	133135
181	2-4-1-0-1-0-0-0-0	0.0537363	10.0896	0	100000	130571
182	2-1-1-0-0-4-0-0-0	0.0529153	7.89436	0	100000	129195
183	2-3-1-1-1-0-0-0-0	0.0523398	9.95504	0	100000	130482
184	2-4-2-2-0-0-0-0-0	0.0515643	10.1861	0	100000	129644
185	2-7-1-0-0-0-0-0-0	0.0508675	10.0897	0	100000	128432
186	2-2-0-0-1-2-0-0-0	0.050018	8.52115	0	100000	129274
187	0-3-0-1-0-1-0-1-1	0.0484965	6.70207	0	100000	133084
188	0-4-0-0-0-1-0-1-1	0.0478281	6.63089	0	100000	132402
189	1-3-1-1-0-0-0-1-0	0.0467019	6.72304	0	100000	132737
190	2-3-0-0-0-4-0-0-0	0.0466877	8.34858	0	100000	126852
191	1-4-1-0-0-0-0-1-0	0.0402137	6.21422	0	100000	129629
192	0-2-0-1-0-4-0-0-2	0.0401899	7.62845	0	100000	124946
193	2-5-1-0-0-2-0-0-0	0.0375957	8.48108	0	100000	124085
194	2-5-2-1-0-0-0-0-0	0.0375229	8.62896	0	100000	124560
195	2-4-1-1-0-2-0-0-0	0.0344371	8.11522	0	100000	123201
196	1-5-0-0-0-3-0-0-1	0.0335057	7.86056	0	100000	122348
197	1-2-0-1-0-0-1-0-0	0.0315784	5.03312	0	100000	128022
198	1-3-0-0-0-0-1-0-0	0.0309426	4.94191	0	100000	127445
199	1-4-0-0-1-1-0-0-1	0.0304526	7.37123	0	100000	122136
200	2-3-1-2-0-2-0-0-0	0.0302493	7.59246	0	100000	121865
201	1-1-0-0-1-0-0-1-0	0.0285825	4.32196	0	100000	126004
202	1-0-0-0-0-5-0-0-1	0.0282986	4.85846	0	100000	120296
203	0-1-0-0-0-1-1-0-1	0.0269726	3.76632	7.50134	100000	125128
204	2-6-2-0-0-0-0-0-0	0.0267112	7.23206	0	100000	120173
205	1-4-0-1-0-3-0-0-1	0.0261602	6.92944	0	100000	119742
206	0-2-0-0-1-2-0-0-2	0.0244983	5.78426	0	100000	119774
207	2-5-0-4-0-0-0-0-0	0.0241507	7.57833	0	100000	119453
208	1-3-0-1-1-1-0-0-1	0.023883	6.50999	0	100000	119607
209	2-1-0-0-2-0-0-0-0	0.0225321	5.49648	0	100000	119970
210	1-2-0-0-0-2-0-1-0	0.0217084	3.83038	0	100000	120999
211	1-5-0-3-0-1-0-0-1	0.0206587	6.89132	0	100000	117716
212	2-2-0-1-0-4-0-0-0	0.0206072	5.47974	0	100000	117400
213	0-4-0-3-0-2-0-0-2	0.0201523	6.70629	0	100000	117497
214	1-3-0-2-0-3-0-0-1	0.0181269	5.74468	0	100000	116385
215	2-3-2-0-1-0-0-0-0	0.0167589	5.52179	0	100000	116353
216	0-5-0-2-0-2-0-0-2	0.0165896	6.068	0	100000	115602
217	2-6-0-3-0-0-0-0-0	0.014994	5.93046	0	100000	114918
218	1-6-0-2-0-1-0-0-1	0.0146671	5.77799	0	100000	114607
219	0-6-0-1-0-2-0-0-2	0.0132296	5.39596	0	100000	113708
220	0-7-0-0-0-2-0-0-2	0.00999131	4.66743	0	100000	111716
221	1-7-0-1-0-1-0-0-1	0.00983676	4.70506	0	100000	111722
222	1-4-0-2-0-0-0-1-0	0.0096567	3.395	0	100000	113634
223	2-4-0-2-1-0-0-0-0	0.00945274	4.55074	0	100000	112017
224	2-5-0-1-1-0-0-0-0	0.00899293	4.43601	0	100000	111590
225	2-7-0-2-0-0-0-0-0	0.00848991	4.43292	0	100000	110946
226	2-6-0-0-1-0-0-0-0	0.00802493	4.18198	0	100000	110818
227	1-2-1-0-0-0-1-0-0	0.0078818	2.41431	0	100000	113216
228	2-4-2-0-0-2-0-0-0	0.00773879	3.77303	0	100000	110461
229	1-5-0-1-0-0-0-1-0	0.00653057	2.78196	0	100000	110953
230	1-8-0-0-0-1-0-0-1	0.00595907	3.63897	0	100000	108946
231	1-4-1-3-0-1-0-0-1	0.00574871	3.58588	0	100000	109116
232	2-3-2-1-0-2-0-0-0	0.00555863	3.19117	0	100000	108900
233	2-5-1-3-0-0-0-0-0	0.00437731	3.16816	0	100000	107909
234	1-4-1-0-0-3-0-0-1	0.00418243	2.71772	0	100000	107515
235	2-8-0-1-0-0-0-0-0	0.00404216	3.03654	0	100000	107381
236	1-6-0-0-0-0-0-1-0	0.00401073	2.16926	0	100000	108398
237	1-3-1-0-1-1-0-0-1	0.00327179	2.36416	0	100000	106889
238	1-5-1-2-0-1-0-0-1	0.00290868	2.53945	0	100000	106348
239	2-7-0-0-0-2-0-0-0	0.00204762	2.11823	0	100000	105165
240	2-6-0-1-0-2-0-0-0	0.00201146	2.10344	0	100000	105161
241	1-2-0-0-1-0-0-1-0	0.00183486	1.23807	0	100000	105960
242	2-5-0-2-0-2-0-0-0	0.00172858	1.95058	0	100000	104820
243	0-4-0-0-0-4-0-0-2	0.00168162	1.68965	0	100000	104651
244	2-1-1-0-1-2-0-0-0	0.00159636	1.47154	0	100000	104793
245	2-2-1-0-0-4-0-0-0	0.00144473	1.4221	0	100000	104363
246	1-1-0-0-0-5-0-0-1	0.00136138	1.19848	0	100000	104166
247	1-3-1-1-0-3-0-0-1	0.00132168	1.52192	0	100000	104205
248	2-9-0-0-0-0-0-0-0	0.00129169	1.70417	0	100000	104080
249	2-4-0-3-0-2-0-0-0	0.00127745	1.67567	0	100000	104171
250	2-6-1-2-0-0-0-0-0	0.00126008	1.68897	0	100000	104137
251	1-6-1-1-0-1-0-0-1	0.00110952	1.56122	0	100000	103843
252	2-3-0-0-1-2-0-0-0	0.00110638	1.36533	0	100000	103920
253	0-3-0-2-0-1-0-1-1	0.00106114	1.09227	0	100000	104346
254	1-3-1-2-0-0-0-1-0	0.0010067	1.08284	0	100000	104277
255	0-4-0-1-0-1-0-1-1	0.000903385	1.00798	0	100000	103951
256	1-2-1-1-1-1-0-0-1	0.000823841	1.17988	0	100000	103442
257	0-5-0-0-0-1-0-1-1	0.000641909	0.846118	0	100000	103290
258	1-4-1-1-0-0-0-1-0	0.00024094	0.528987	0	100000	102043
259	1-7-1-0-0-1-0-0-1	0.000174903	0.616841	0	100000	101497
260	2-4-2-3-0-0-0-0-0	9.6679e-05	0.464981	0	100000	101154
261	2-7-1-1-0-0-0-0-0	5.24373e-05	0.342594	0	100000	100824
262	2-4-1-1-1-0-0-0-0	3.53773e-05	0.273359	0	100000	100700
263	2-5-1-0-1-0-0-0-0	2.8511e-05	0.24534	0	100000	100623
264	2-2-0-0-2-0-0-0-0	1.67592e-05	0.163248	0	100000	100497
265	2-3-1-2-1-0-0-0-0	1.60056e-05	0.183696	0	100000	100475
266	2-4-0-0-0-4-0-0-0	5.25428e-06	0.0949615	0	100000	100256
267	0-3-0-1-0-4-0-0-2	2.7178e-11	0.01	1.10559e-07	100000	100000

## Sheet: cs3_mol_list
Rank	Molecule	Thermal eff.	Superheat (K)	P inlet (Pa)	P outlet (Pa)
1	0-1-0-0-0-2-0-0-2	0.112927	0	122469	448727
2	2-0-0-0-0-2-0-0-0	0.112361	2.17737e-05	300663	956997
3	0-0-0-0-0-2-0-0-2	0.112325	0	394008	1203790
4	2-1-1-0-0-0-0-0-0	0.112195	0	282631	912679
5	1-2-0-0-0-1-0-0-1	0.111527	0	120127	438146
6	2-2-0-1-0-0-0-0-0	0.111504	0	116957	436622
7	1-1-0-0-0-1-0-0-1	0.110763	0.000182661	399563	1198340
8	2-3-0-0-0-0-0-0-0	0.110474	0	100000	374871
9	2-2-0-0-0-0-0-0-0	0.109874	0	332000	1018360
10	2-1-0-0-0-2-0-0-0	0.108597	0	100000	360839
11	1-1-1-0-0-1-0-0-1	0.107121	0	100000	356209
12	2-1-0-0-0-0-0-0-0	0.105024	0	1182350	3024930
13	1-0-0-0-0-1-0-0-1	0.103214	0.475214	1431190	3604700
14	2-2-1-0-0-0-0-0-0	0.0987575	0	100000	323213
15	2-1-2-0-0-0-0-0-0	0.086685	0	100000	279467
16	2-0-0-0-1-0-0-0-0	0.074416	0	100000	247576
17	1-2-0-1-0-1-0-0-1	0.053005	0	100000	184330
18	0-2-0-0-0-2-0-0-2	0.0497359	0	100000	175851
19	1-3-0-0-0-1-0-0-1	0.0462315	0	100000	168982
20	2-3-0-1-0-0-0-0-0	0.0431695	0	100000	164085
21	1-0-0-0-0-3-0-0-1	0.0386769	0	100000	154043
22	2-4-0-0-0-0-0-0-0	0.0330685	0	100000	144970
23	2-2-0-0-0-2-0-0-0	0.031504	0	100000	142309
24	2-2-1-1-0-0-0-0-0	0.0289615	0	100000	139309
25	1-2-1-0-0-1-0-0-1	0.0266543	0	100000	135012
26	2-3-1-0-0-0-0-0-0	0.0175022	0	100000	121606
27	2-1-0-0-1-0-0-0-0	0.00917494	0	100000	111257
28	1-0-0-0-0-0-0-1-0	0.00390476	0	100000	105565
29	2-2-2-0-0-0-0-0-0	0.00124622	0	100000	101403

## Sheet: starting points
		test result
Mol. #	molecule	CS1	CS2	CS3
1	0-0-0-0-0-4-0-0-2	2	1	2
2	2-0-0-0-0-0-0-0-0	1	1	2		1	tests passed
3	2-1-0-0-0-0-0-0-0	1	1	1		2	Test 1 failed (saturation behaviour)
4	2-2-0-0-0-0-0-0-0	1	1	1		3	Test 0 failed (melting point constraint)
5	2-3-0-0-0-0-0-0-0	1	1	1
6	1-0-0-0-0-1-0-0-1	1	1	1
7	2-2-0-1-0-0-0-0-0	1	1	1
8	0-3-0-0-0-2-0-0-2	1	1	2
9	1-1-0-0-0-3-0-0-1	1	1	2
10	0-0-0-0-5-3-0-1-1	2	2	2
11	0-2-0-1-1-2-0-2-0	2	2	2
12	0-3-0-0-0-3-1-0-1	2	2	2
13	0-3-0-0-4-1-1-0-1	2	2	3
14	1-1-1-0-6-0-1-0-0	3	2	3
15	0-0-0-0-4-2-1-1-0	3	2	3
16	1-0-0-0-0-0-1-0-0	1	1	2
17	2-1-2-0-0-0-0-0-0	1	1	1
18	0-2-0-0-0-0-1-1-0	2	2	2
19	2-2-0-1-1-0-0-0-0	2	2	2
20	2-5-2-0-1-0-0-0-0	2	2	2
	test passed	10	11	6
	test failed	8	9	11
	t_melt failed	2	0	3

## Sheet: cs1
			without tests								with tests
Mol. #	initial test	Starting point	# iterations	# unique	# int cut	# primal ev	# init fail	#init succ, opt fail	# success prim	Molecule	# iterations	# unique	# test != 1	# int cut	# prim ev.	Molecule
1	2	0-0-0-0-0-4-0-0-2	9	8	5	8	0	4	4	2-2-0-0-0-0-0-0-0	11	7	2	4	5	2-1-0-0-0-0-0-0-0
2	1	2-0-0-0-0-0-0-0-0	7	5	4	5	0	2	3	2-1-0-0-0-0-0-0-0	11	6	1	5	5	2-1-0-0-0-0-0-0-0
3	1	2-1-0-0-0-0-0-0-0	11	7	6	7	0	2	5	2-1-0-0-0-0-0-0-0	13	8	2	5	6	2-1-0-0-0-0-0-0-0
4	1	2-2-0-0-0-0-0-0-0	9	6	4	6	0	1	5	2-2-0-0-0-0-0-0-0	10	6	1	4	5	1-0-0-0-0-1-0-0-1
5	1	2-3-0-0-0-0-0-0-0	8	5	3	5	0	0	5	1-0-0-0-0-1-0-0-1	8	5	0	3	5	1-0-0-0-0-1-0-0-1
6	1	1-0-0-0-0-1-0-0-1	10	6	4	6	0	0	6	2-1-0-0-0-0-0-0-0	10	6	0	4	6	2-1-0-0-0-0-0-0-0
7	1	2-2-0-1-0-0-0-0-0	6	5	2	5	0	1	4	2-1-0-0-0-0-0-0-0	9	6	1	3	5	2-1-0-0-0-0-0-0-0
8	1	0-3-0-0-0-2-0-0-2	9	6	4	6	0	1	5	1-0-0-0-0-1-0-0-1	10	6	1	4	5	1-0-0-0-0-1-0-0-1
9	1	1-1-0-0-0-3-0-0-1	9	6	4	6	0	1	5	2-1-0-0-0-0-0-0-0	10	6	1	4	5	2-1-0-0-0-0-0-0-0
10	2	0-0-0-0-5-3-0-1-1	7	6	4	6	0	3	3	2-2-0-0-0-0-0-0-0	7	5	2	2	3	2-4-0-0-0-0-0-0-0
11	2	0-2-0-1-1-2-0-2-0	9	7	5	7	0	3	4	2-1-0-0-0-0-0-0-0	10	7	2	4	5	2-1-0-0-0-0-0-0-0
12	2	0-3-0-0-0-3-1-0-1	7	5	3	5	0	1	4	2-1-0-0-0-0-0-0-0	11	7	2	4	5	2-1-0-0-0-0-0-0-0
13	2	0-3-0-0-4-1-1-0-1	7	5	4	5	0	2	3	2-0-0-0-0-2-0-0-0	7	5	2	2	3	2-3-0-0-0-0-0-0-0
14	3	1-1-1-0-6-0-1-0-0	6	5	4	5	0	3	2	2-1-0-0-0-0-0-0-0	8	6	3	2	3	2-3-0-0-0-0-0-0-0
15	3	0-0-0-0-4-2-1-1-0	8	6	5	6	0	3	3	2-1-0-0-0-0-0-0-0	8	6	3	2	3	2-3-0-0-0-0-0-0-0
16	1	1-0-0-0-0-0-1-0-0	7	5	3	5	0	1	4	2-1-0-0-0-0-0-0-0	10	6	1	4	5	2-1-0-0-0-0-0-0-0
17	1	2-1-2-0-0-0-0-0-0	8	5	3	5	0	0	5	1-0-0-0-0-1-0-0-1	8	5	0	3	5	1-0-0-0-0-1-0-0-1
18	2	0-2-0-0-0-0-1-1-0	7	5	4	5	0	2	3	2-1-0-0-0-0-0-0-0	11	7	2	4	5	2-1-0-0-0-0-0-0-0
19	2	2-2-0-1-1-0-0-0-0	6	5	3	5	0	2	3	2-1-0-0-0-0-0-0-0	13	9	4	4	5	2-1-0-0-0-0-0-0-0
20	2	2-5-2-0-1-0-0-0-0	7	5	3	5	0	1	4	1-0-0-0-0-1-0-0-1	12	8	3	4	5	2-1-0-0-0-0-0-0-0
Total			157	113	77	113	0	33	80		197	127	33	71	94

## Sheet: cs2
			without tests								with tests
Mol. #	initial test	Starting point	# iterations	# unique	# int cut	# primal ev	# init fail	#init succ, opt fail	# success prim	Molecule	# iterations	# unique	# test != 1	# int cut	# prim ev.	Molecule
1	1	0-0-0-0-0-4-0-0-2	9	7	3	7	0	1	6	2-1-0-0-0-0-0-0-0	9	7	1	3	6	2-1-0-0-0-0-0-0-0
2	1	2-0-0-0-0-0-0-0-0	12	8	6	8	0	2	6	2-2-0-0-0-0-0-0-0	16	11	2	6	9	2-1-0-0-0-0-0-0-0
3	1	2-1-0-0-0-0-0-0-0	7	6	3	6	0	2	4	2-1-0-0-0-0-0-0-0	11	8	2	4	6	2-2-0-0-0-0-0-0-0
4	1	2-2-0-0-0-0-0-0-0	10	7	4	7	0	1	6	2-2-0-0-0-0-0-0-0	10	7	1	4	6	2-2-0-0-0-0-0-0-0
5	1	2-3-0-0-0-0-0-0-0	10	7	4	7	0	1	6	2-2-0-0-0-0-0-0-0	14	9	1	6	8	2-2-0-0-0-0-0-0-0
6	1	1-0-0-0-0-1-0-0-1	8	6	4	6	0	2	4	2-1-0-0-0-0-0-0-0	9	7	1	2	6	0-0-0-0-0-2-0-0-2
7	1	2-2-0-1-0-0-0-0-0	13	9	6	9	0	2	7	2-2-0-0-0-0-0-0-0	17	12	2	6	10	2-1-0-0-0-0-0-0-0
8	1	0-3-0-0-0-2-0-0-2	28	17	12	17	0	1	16	2-1-0-0-0-0-0-0-0	12	10	3	3	7	2-1-0-0-0-0-0-0-0
9	1	1-1-0-0-0-3-0-0-1	14	10	5	10	0	1	9	2-1-0-0-0-0-0-0-0	14	11	2	4	9	2-1-0-0-0-0-0-0-0
10	2	0-0-0-0-5-3-0-1-1	9	7	5	7	0	3	4	2-1-0-0-0-0-0-0-0	11	8	2	4	6	2-1-0-0-0-0-0-0-0
11	2	0-2-0-1-1-2-0-2-0	8	7	5	7	0	4	3	2-1-0-0-0-0-0-0-0	8	7	2	2	5	2-1-0-0-0-0-0-0-0
12	2	0-3-0-0-0-3-1-0-1	10	7	5	7	0	2	5	2-1-0-0-0-0-0-0-0	9	8	3	2	5	2-1-0-0-0-0-0-0-0
13	2	0-3-0-0-4-1-1-0-1	9	7	4	7	0	2	5	2-1-0-0-0-0-0-0-0	12	8	2	5	6	2-2-0-0-0-0-0-0-0
14	2	1-1-1-0-6-0-1-0-0	7	6	3	6	0	2	4	2-1-0-0-0-0-0-0-0	9	7	1	2	6	2-1-0-0-0-0-0-0-0
15	2	0-0-0-0-4-2-1-1-0	10	7	5	7	0	2	5	2-1-0-0-0-0-0-0-0	12	8	2	5	6	2-2-0-0-0-0-0-0-0
16	1	1-0-0-0-0-0-1-0-0	6	5	2	5	0	1	4	2-1-0-0-0-0-0-0-0	8	7	2	2	5	2-1-0-0-0-0-0-0-0
17	1	2-1-2-0-0-0-0-0-0	12	8	6	8	0	2	6	2-1-0-0-0-0-0-0-0	17	12	2	6	10	2-1-0-0-0-0-0-0-0
18	2	0-2-0-0-0-0-1-1-0	27	16	12	16	0	1	15	2-1-0-0-0-0-0-0-0	9	8	3	2	5	2-1-0-0-0-0-0-0-0
19	2	2-2-0-1-1-0-0-0-0	19	13	7	13	0	1	12	2-1-0-0-0-0-0-0-0	19	13	1	7	12	2-1-0-0-0-0-0-0-0
20	2	2-5-2-0-1-0-0-0-0	27	16	13	16	0	2	14	2-1-0-0-0-0-0-0-0	11	10	5	2	5	2-1-0-0-0-0-0-0-0
Total			255	176	114	176	0	35	141		237	178	40	77	138

## Sheet: cs3
			without tests								with tests
Mol. #	initial test	Starting point	# iterations	# unique	# int cut	# primal ev	# init fail	#init succ, opt fail	# success prim	Molecule	# iterations	# unique	# test != 1	# int cut	# prim ev.	Molecule
1	2	0-0-0-0-0-4-0-0-2	8	7	5	7	0	4	3	2-2-0-0-0-0-0-0-0	12	9	4	5	5	2-0-0-0-0-2-0-0-0
2	2	2-0-0-0-0-0-0-0-0	8	7	5	7	0	4	3	2-2-0-0-0-0-0-0-0	15	11	5	6	6	2-0-0-0-0-2-0-0-0
3	1	2-1-0-0-0-0-0-0-0	10	7	5	7	0	2	5	0-0-0-0-0-2-0-0-2	10	7	2	5	5	0-0-0-0-0-2-0-0-2
4	1	2-2-0-0-0-0-0-0-0	9	7	4	7	0	2	5	0-0-0-0-0-2-0-0-2	11	8	2	5	6	0-0-0-0-0-2-0-0-2
5	1	2-3-0-0-0-0-0-0-0	11	8	6	8	0	3	5	2-3-0-0-0-0-0-0-0	11	8	2	3	6	2-3-0-0-0-0-0-0-0
6	1	1-0-0-0-0-1-0-0-1	5	5	2	5	0	2	3	2-1-0-0-0-0-0-0-0	10	7	2	5	5	0-0-0-0-0-2-0-0-2
7	1	2-2-0-1-0-0-0-0-0	5	5	3	5	0	3	2	2-2-0-1-0-0-0-0-0	7	7	3	2	4	2-1-1-0-0-0-0-0-0
8	2	0-3-0-0-0-2-0-0-2	10	7	6	7	0	3	4	1-1-0-0-0-1-0-0-1	12	9	4	5	5	2-0-0-0-0-2-0-0-0
9	2	1-1-0-0-0-3-0-0-1	10	7	6	7	0	3	4	2-1-1-0-0-0-0-0-0	12	9	4	5	5	2-0-0-0-0-2-0-0-0
10	2	0-0-0-0-5-3-0-1-1	10	9	8	9	0	7	2	2-3-0-0-0-0-0-0-0	9	6	3	3	3	2-3-0-0-0-0-0-0-0
11	2	0-2-0-1-1-2-0-2-0	9	7	6	7	0	4	3	2-1-1-0-0-0-0-0-0	15	10	4	7	6	2-0-0-0-0-2-0-0-0
12	2	0-3-0-0-0-3-1-0-1	7	7	5	7	0	5	2	2-1-0-0-0-0-0-0-0	12	9	4	5	5	2-0-0-0-0-2-0-0-0
13	3	0-3-0-0-4-1-1-0-1	5	5	4	5	0	4	1	2-1-0-0-0-0-0-0-0	16	12	6	6	6	2-0-0-0-0-2-0-0-0
14	3	1-1-1-0-6-0-1-0-0	5	5	4	5	0	4	1	2-1-0-0-0-0-0-0-0	16	12	6	6	6	2-0-0-0-0-2-0-0-0
15	3	0-0-0-0-4-2-1-1-0	8	7	6	7	0	5	2	2-1-0-0-0-0-0-0-0	16	12	6	6	6	2-0-0-0-0-2-0-0-0
16	2	1-0-0-0-0-0-1-0-0	7	6	4	6	0	3	3	2-2-0-0-0-0-0-0-0	12	9	4	5	5	2-1-1-0-0-0-0-0-0
17	1	2-1-2-0-0-0-0-0-0	9	7	5	7	0	3	4	2-2-0-0-0-0-0-0-0	12	8	3	6	5	2-0-0-0-0-2-0-0-0
18	2	0-2-0-0-0-0-1-1-0	9	7	5	7	0	3	4	2-1-1-0-0-0-0-0-0	11	8	3	5	5	2-1-1-0-0-0-0-0-0
19	2	2-2-0-1-1-0-0-0-0	10	7	6	7	0	3	4	2-1-1-0-0-0-0-0-0	12	9	4	5	5	2-0-0-0-0-2-0-0-0
20	2	2-5-2-0-1-0-0-0-0	11	8	7	8	0	4	4	2-2-0-0-0-0-0-0-0	11	9	4	4	5	2-0-0-0-0-2-0-0-0
Total			166	135	102	135	0	71	64		242	179	75	99	99

## Sheet: water
Case Study 1				Case Study 2				Case Study 3
High Pressure		115401		High Pressure		373136		*water infeasible
Low Pressure		100000		Low Pressure		100000
MassFlowrate		0.711264		MassFlowrate		7.23438
superheat		5.6724		superheat		58.2394
power generation		0.0136631		power generation		1.39101
Molecular Ranking		47/52		Molecular Ranking		49/268

## Sheet: cs1 properties
Molecule	Liquid Density	Latent Heat	Liquid Heat Capacity	Vapour Heat Capacity	Molecular Weight	Critical Pressure	Critical Temperature
010002002	659.575	25773.6	146.89743	101.742	68.1672	3.71703e+06	461.821
020002002	656.838	28798.5	185.73948	135.971	82.1942	3.39472e+06	503.211
020102002	729.467	32143.7	216.54183	159.836	98.1942	3.3245e+06	542.51
030002002	651.498	31658.7	227.22264	172.786	96.2213	3.127e+06	539.619
100000010	752.474	39010.3	138.73292	84.4785	46.07	6.95158e+06	521.783
100000100	910.001	22031.9	54.564991	174.674	60.055	6.85005e+06	570.169
100001001	610.997	18576.1	87.088213	51.1595	42.1051	4601360	364.975
110000010	743.271	41365.4	187.47727	111.164	60.0971	5.66168e+06	544.42
110001001	628.966	22281.1	121.15672	80.011	56.1321	4.27322e+06	422.107
110003001	663.939	31842.4	191.987	142.181	82.2181	3.35267e+06	544.667
111001001	738.329	27097	153.38753	106.13	72.1321	4.21864e+06	484.191
120001001	635.172	25682.1	158.76507	112.539	70.1592	3.87818e+06	469.32
120101001	720.358	29145.1	189.4873	136.559	86.1592	3.71693e+06	508.969
121001001	721.175	30192.3	192.07236	139.531	86.1592	3.75321e+06	523.691
121101001	789.988	33424.5	221.01466	161.861	102.159	3.66751e+06	560.584
130001001	635.405	28829.4	199.22252	148.028	84.1863	3.50017e+06	509.522
130101001	704.295	32067.1	230.37873	172.409	100.186	3.33744e+06	544.698
131001001	705.151	33069.3	233.32063	175.693	100.186	3.36086e+06	558.109
140001001	632.356	31761.4	242.04056	185.96	98.2134	3163644	544.54
200000000	535.273	14665.2	64.450259	34.95	30.07	5.53699e+06	314.751
200010000	878.77	30404.7	155.64815	96.8703	74.113	4.65233e+06	496.574
210000000	582.756	18928.2	97.213996	60.8937	44.0971	4.85818e+06	378.062
210002000	639.701	26509.3	157.43955	111.035	70.183	3.44185e+06	470.354
210010000	831.356	32475.9	189.73543	127.975	88.1401	3.90623e+06	522.249
211000000	717.938	23830.9	129.0598	86.5285	60.0971	4.7524e+06	443.856
211002000	726.837	31478.2	192.1781	139.482	86.183	3.67834e+06	538.521
212000000	823.256	28489.7	158.71224	109.796	76.0971	4.67527e+06	503.052
220000000	604.173	22708.2	133.47557	91.2467	58.1242	4.28758e+06	432.709
220002000	638.729	29503.8	197.99774	146.688	84.2101	3.24535e+06	511.576
220010000	795.147	34685	227.22626	161.95	102.167	3.43058e+06	551.276
220100000	706.004	26243.6	164.0227	115.149	74.1242	4.09005e+06	473.736
220102000	708.283	33071.2	230.33491	172.237	100.21	3.28538e+06	556.25
221000000	707.108	27300.4	166.43533	117.9	74.1242	4.14456e+06	489.252
221002000	709.392	34137.8	233.51276	175.734	100.21	3.32357e+06	570.001
221100000	788.459	30603.8	195.11051	139.97	90.1242	3.99961e+06	526.789
222000000	789.774	31668.5	197.42001	142.493	90.1242	4.06235e+06	542.119
222100000	855.009	34759.8	224.84975	163.426	106.124	3.92844e+06	575.858
230000000	613.242	26134.5	172.74135	125.061	72.1513	3.8086e+06	477.555
230002000	634.848	32331.2	240.94403	184.731	98.2372	3.01097e+06	547.919
230100000	693.826	29439.5	203.74961	149.369	88.1513	3.62523e+06	513.952
230200000	759.338	32538.5	233.17583	172.32	104.151	3.49426e+06	547.981
231000000	694.881	30451.3	206.56352	152.498	88.1513	3.6622e+06	528.079
231100000	760.656	33547.3	235.88565	175.226	104.151	3.53908e+06	561.909
232000000	761.877	34564	238.59581	178.133	104.151	3.58333e+06	561.433
240000000	615.776	29283.6	214.54801	161.677	86.1784	3.40727e+06	514.144
240100000	681.361	32382.4	245.89532	186.302	102.178	3.24626e+06	547.987
241000000	682.396	33355	249.03807	189.727	102.178	3.27196e+06	562.039
250000000	614.587	32205.8	258.50993	200.608	100.205	3.07013e+06	550.314
200002000	635.401	23349	119.87847	78.2756	56.156	3.58226e+06	421.372
000002002	657.334	22588.4	111.36124	70.6538	54.1401	3.54625e+06	408.626
100003001	669.276	29551.2	153.53869	108.322	68.191	3.61793e+06	513.424

[truncated: 2 more sheets: cs2 properties, cs3 properties]
